# Supplementary material
Source: PubMed Central journal article supplement (PMC3199370)
Supplement: NIHMS315340-supplement-01.pdf [file NIHMS315340-supplement-01.pdf]

# Supporting Information

## **Protein targets for carbonylation by 4-hydroxy-2-nonenal in rat liver mitochondria**

*Jia Guo<sup>a</sup>, Navin Rauniyar<sup>a</sup>, Vien Ngyuen<sup>a</sup>, Bettina Ughy<sup>b</sup>, Katalin Prokai-Tatrai<sup>c</sup>, Laszlo Prokai<sup>a,\*</sup>*

<sup>a</sup>*Department of Molecular Biology and Immunology, University of North Texas Health Science Center, 3500 Camp Bowie Boulevard, Fort Worth, TX 76101, USA*

<sup>b</sup>*Biological Research Centre, Hungarian Academy of Sciences, Szeged, Hungary.*

<sup>c</sup>*Department of Pharmacology and Neuroscience, University of North Texas Health Science Center, 3500 Camp Bowie Boulevard, Fort Worth, TX 76101, USA*

**Supplementary Table S1. A list of HNE-modified tryptic peptides of primarily non-mitochondrial liver proteins identified after SPH enrichment and data-dependent MS/MS acquisition.**

| <b>Protein name (<i>gene symbol</i>)</b>                                         | <b>IPI accession number</b> | <b>HNE-modified peptides</b> | <b>Modification site(s)</b> |
|----------------------------------------------------------------------------------|-----------------------------|------------------------------|-----------------------------|
| Arginase-1 ( <i>Arg1</i> ) <sup>a</sup>                                          | IPI00327518                 | DHGDLAFVDVPNDSPFQIVKNPR      | 50                          |
| Carbonic anhydrase 3 ( <i>Ca3</i> ) <sup>a</sup>                                 | IPI00230788                 | DIRHDPSLQPWSVSYDPGSAK        | 40                          |
| Carboxylesterase 3 ( <i>Ces3</i> ) <sup>b</sup>                                  | IPI00326972                 | AKEAAEESHWK                  | 559                         |
| Fatty acid-binding protein ( <i>Fabp1</i> ) <sup>c</sup>                         | IPI00190790                 | GVSEIVHEGKK                  | 43                          |
| 78 kDa glucose-regulated protein ( <i>Hspa5</i> ) <sup>d</sup>                   | IPI00206624                 | VTHAVVTVPAYFNDAQR            | 167                         |
| Glutathione S-transferase alpha-2 ( <i>Gsta2</i> ) <sup>a</sup>                  | IPI00555178                 | SHGQDYLVGNR                  | 143                         |
| Hydroxyacid oxidase 1 ( <i>Hao1</i> ) <sup>e</sup>                               | IPI00207601                 | HGVDGILVSNHGAR               | 260                         |
| Isoform 1 of Peroxisomal acyl-coenzyme A oxidase 1 ( <i>Acox1</i> ) <sup>e</sup> | IPI00211510                 | ASATFNPELITHILDGSPENTR       | 21                          |
| Peroxiredoxin 4 ( <i>Prdx4</i> ) <sup>a</sup>                                    | IPI00208209                 | TRENECHFYAGGQVYPGEVSR        | 54                          |
| Phosphoglycerate mutase 1 ( <i>Pgam1</i> ) <sup>f</sup>                          | IPI00421428                 | HGEAQVK                      | 107                         |
| Programmed cell death 5 ( <i>Pdcd5</i> ) <sup>g</sup>                            | IPI00193547                 | HGDPGDAAQQEAK                | 21                          |

<sup>a</sup> = cytosol

<sup>b</sup> = endoplasmic reticulum (also in mitochondria)

<sup>c</sup> = cytosol, nucleus and peroxisome

<sup>d</sup> = endoplasmic reticulum

<sup>e</sup> = peroxisome.

<sup>f</sup> = cytosol and nucleus

<sup>g</sup> = nucleus and cytoplasm

IPI00551812 (100%), 56,354.3 Da

ATP synthase subunit beta, mitochondrial

12 unique peptides, 16 unique spectra, 21 total spectra, 194/529 amino acids (37% coverage)

```
MLSLVGRVAS ASASGALRGL NPLAALPQAH LLLRTAPAGV HPARDYAAQS SAAPKAGTAT
GQIVAVIGAV VDVQFDEGLP PILNALEVQG RESRLVLEVA QHLGESTVRT IAMDGTEGLV
RGQKVLDSGA PIKIPVGPET LGRI MNVIGE PIDERGPIKT KQFAPIHAEA PEFIEMSVEQ
EILVTGIKVV DLLAPYAKGG KIGLFGGAGV GKTVLMELI NNVAKAHGGY SVFAGVGERT
REGNDLYHEM IESGVINLKD ATSKVALVYG QMNEPPGARAR VALTGLTVA EYFRDQEGQD
VLLFIDNIFR FTQAGSEVSA LLGRIPSAVG YQPTLATDMG TMQERITTTK KGSITSVQAI
YVPADDLTDP APATTFAHLD ATTVLSRAIA ELGIYPAVDP LDSTSRIMDP NIVGSEHYDV
ARGVQKILQD YKSLQDI IAI LGMDELSEED KLTVSRARKI QRFLSQPFQV AEVFTGHMGK
LVPLKETIKG FQQILAGDYD HLPEQAFYMV GPIEEAVAKA DKLAEHGS
```

**Supplementary Fig. S1.** ATP synthase  $\beta$ -subunit tryptic peptides identified (highlighted by yellow within the protein sequence, green highlights indicate modified residue, M = methionine oxidation) in the protein by in-gel digestion, data-dependent LC-MS/MS and protein database search from the 50 $\pm$ 5 kDa SDS-PAGE band of liver mitochondrial proteins (Fig 2 (a)).

IPI00210644 (100%), 164,582.7 Da

Carbamoyl-phosphate synthase [ammonia], mitochondrial

47 unique peptides, 66 unique spectra, 90 total spectra, 540/1500 amino acids (36% coverage)

|             |             |             |             |              |             |
|-------------|-------------|-------------|-------------|--------------|-------------|
| MTRILTACKV  | VKTLKSGFGL  | ANVTSKRQWD  | FSRPGIRLLS  | VK AQT AHIVL | EDGTKMKGYS  |
| FGHPSSVAGE  | VVFNTGLGGY  | SEALTDPAYK  | GQILT MANPI | IGNGGAPDTT   | ARDELGLNKY  |
| MESDGIK VAG | LLVLNYSHDY  | NHWLATK SLG | QWLQEEKVPA  | IYGVDRMLT    | KIIRDKGTML  |
| GK IEFEGQSV | DFVDPNK QNL | IAEVSTKDVK  | VFGKGNPTKV  | VAVDCGIKNN   | VIRLLVKRGA  |
| EVHLVPWNHD  | FTQMDYDGLL  | IAGGPGNPAL  | AQPLIQNVKK  | ILESDRK EPL  | FGISTGNIIT  |
| GLAAGAK SYK | MSMANR GQNQ | PVLNITNRQA  | FITAQNHGYA  | LDNTLPAGWK   | PLFVNVNDQT  |
| NEGIMHESKP  | FFAVQFHPEV  | SPGPTDTEYL  | FDSFFSLIKK  | GKGTITSVL    | PKPALVASRV  |
| EVSQVILIGS  | GGLSIGQAGE  | FDYSGSQAVK  | AMKEENVKTV  | LMNPNIASVQ   | TNEVGLKQAD  |
| AVYFLPITPQ  | FVTEVIKAER  | PDGLILGMGG  | QTALNCGVEL  | FKRGVLKEYG   | VKVLGTSVES  |
| IMATEDRQLF  | SDKLNEINEK  | IAPSFVAVESM | EDALKAADTI  | GYPVMIRSAY   | ALGGLGSGIC  |
| PNKETLMDLG  | TKAFAMTNQI  | LVERSVTGWK  | EIEYEVV RDA | DDNCVTV CNM  | ENVDAMGVHT  |
| GDSVVVAPAQ  | TLSNAEFQML  | RRTSINVVRH  | LGIVGECNIQ  | FALHPTSM EY  | CIEV NARLS  |
| RSSALASKAT  | GYPLAFIAAK  | IALGIPLPEI  | KNVVSGK TSA | CFEPSLDY MV  | TKIPRWDLDR  |
| FHGTSSRIGS  | SMK SVGEVMA | IGRTFEESFQ  | KALRMCHPSV  | DGFTPR LPMN  | KEWPANLDR   |
| KELSEPSSTR  | IYAI AKALEN | NMSLDEIVKL  | TSIDKWFLYK  | MRDILNMDKT   | LKGLNSESVT  |
| EETLRQAKEI  | GFSDKQISK C | LGLTEAQTRE  | LRLKKN IHPW | VKQIDTLAAE   | YPSVTNYLYV  |
| TYNGQEHDIK  | FDEHGIMVLG  | CGPYHIGSSV  | EFDWCAVSSI  | RTLRLQLGKKT  | VVNVNCPETV  |
| STDFDECDKL  | YFEELS LERI | LDIYHQEACN  | GCIISVGGQI  | PNNLAVPLYK   | NGVK IMGTSP |
| LQIDRAEDRS  | IFSAVLDELK  | VAQAPWKAVN  | TLNEALEFAN  | SVGYPCLLRP   | SYVLSGSAMN  |
| VVFSEDEMKR  | FLEEATR VSQ | EHPVVLTKFI  | EGAREVEMDA  | VGKEGRVISH   | AISEHVEDAG  |
| VHSGDATLML  | PTQTI SQGAI | EKVKDATRKI  | AKAFAISGPF  | NVQFLVK GND  | VLVIECNLRA  |
| SRSFPFVSKT  | LGVD FIDVAT | KVMIGESVDE  | KHLPTLEQPI  | IPSDYVAIKA   | PMFSWPRLRD  |
| ADPILRCEMA  | STGEVACFGE  | GIHTAFLKAM  | LSTGFKIPQK  | GILIGIQQSF   | RPRFLGVAEQ  |
| LHNEGFKLFA  | TEATSDWLN A | NNVPATPVAW  | PSQEGQNP SL | SSIRKLIRDG   | SIDLVINLPN  |
| NNTK FVHDNY | VIRRTAVDSG  | IALLTNFQVT  | KLFAEAVQKA  | RTVDSKSLFH   | YRQYSAGKAA  |

**Supplementary Fig. S2.** Carbamoyl-phosphate synthase tryptic peptides identified (highlighted by yellow within the protein sequence, green highlights indicate modified residue: M = methionine oxidation, C = cystein amidomethylation) by in-gel digestion, data-dependent LC-MS/MS and protein database search from the 150±25 kDa SDS-PAGE band of liver mitochondrial proteins (Fig 2 (a)).
